# Supplementary material for: Electrochemically fabricated gold dendrites with underpotential deposited silver monolayers for a bimetallic SERS-active substrate
Source: Royal Society of Chemistry journal article supplement (doi:10.1039/c5ra27020k), 2016-01-01
Supplement: c5ra27020k1.pdf [file c5ra27020k1.pdf]

Supporting Information for

## Electrochemically fabricated gold dendrites with underpotential deposited silver monolayers for a bimetallic SERS-active substrate

Ying-Huang Lai,<sup>a,\*</sup> Shan-Chi Kuo,<sup>a</sup> Yun-Ching Hsieh,<sup>b</sup> Yu-Chun Tai,<sup>a</sup> Wei-Hsiu Hung,<sup>b,\*</sup> and U-Ser Jeng<sup>c,d,\*</sup>

<sup>a</sup> Department of Chemistry, Tunghai University, Taichung 40704, Taiwan

<sup>b</sup> Department of Chemistry, National Taiwan Normal University, Taipei 11677, Taiwan

<sup>c</sup> National Synchrotron Radiation Research Center, Hsinchu 30076, Taiwan

<sup>d</sup> Chemical Engineering Department, National Tsing-Hua University, Hsinchu, 30013, Taiwan

\* Corresponding author. Tel.: +886(4)23590121ext.32216.

E-mail: yhlai@go.thu.edu.tw

E-mail: whung@ntnu.edu.tw

E-mail: usjeng@nsrrc.org.tw

### Calculation of the electrochemical surface area (ESA)

The ESA can be quantitatively deduced from:

$$\begin{aligned} \text{ESA} &= \frac{\int IdU}{av} \\ &= \frac{1.25 (mA \times V)/cm^2}{(400 \times 10^{-3} mC/cm^2) \times (0.050 V/s) \times (1.05 \times 10^{-3} gAu/cm^2)} = 59524 cm^2/gAu \\ &= 6.0 m^2/gAu \end{aligned}$$

Where I and U are the current and voltage observed in a C-V scan,  $v$  is the scanning rate,  $a = 400 \mu C cm^{-2}$  is a scaling constant for Au surfaces, respectively. The reduction peak of the Au oxides is around 0.79 V.

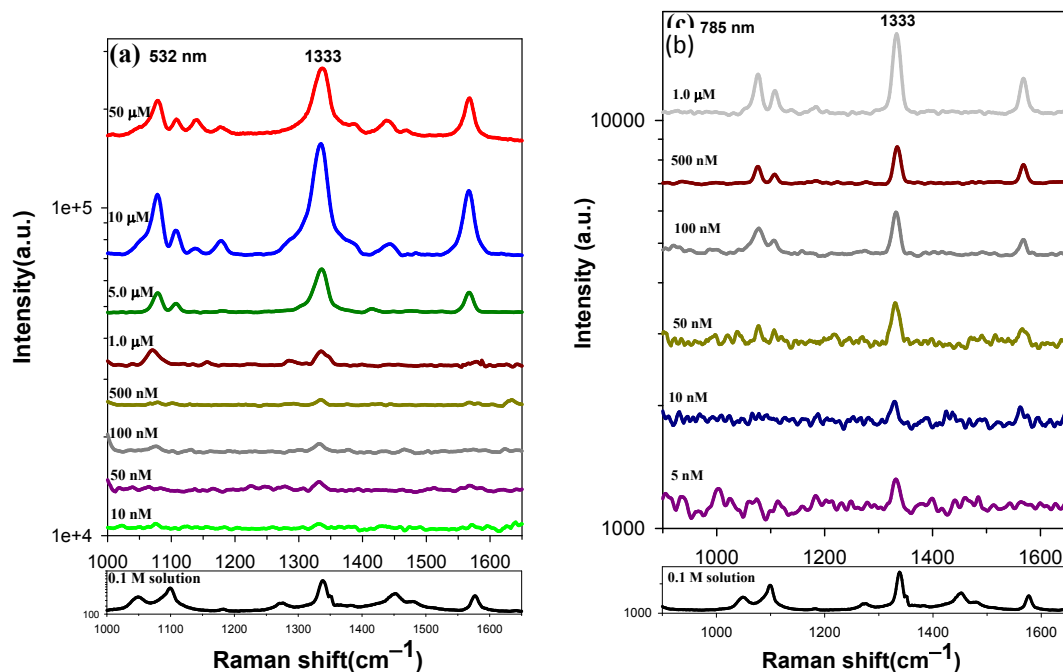

Figure S1. SERS spectra of Ag-Au-Ds after immersion in solutions with the indicated *p*-NTP concentrations. The laser excitation wavelengths are (a) 532 and (b) 785 nm. Also shown is the spectrum for neat GCE drop-coated with a 0.1 M *p*-NTP ethanol solution.

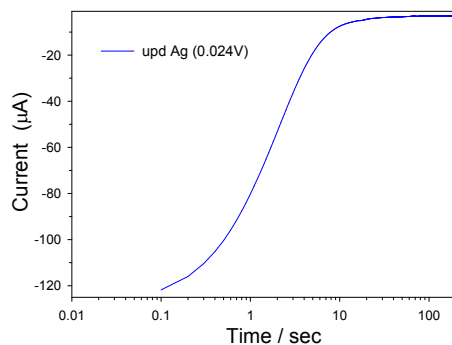

Figure S2. Electric current measured during electrodeposition of Ag on Au-Ds/GCE at a deposition potential of 0.024 V vs. Ag/AgCl.
